# Supplementary material for: How bad is the mere presence of a phone? A replication of Przybylski and Weinstein (2013) and an extension to creativity
Source: PLoS One. 2021 Jun 9;16(6):e0251451. doi: 10.1371/journal.pone.0251451 (PMC8189469; doi:10.1371/journal.pone.0251451)
Supplement: S2 Table — Means and standard deviations by condition, t test values, significance tests, and confidence intervals. (XLSX) [file pone.0251451.s008.xlsx]

## Sheet: S2 Table
S2 Table. t tests for toy creativity scores of all group sizes (Study 1). Means and standard deviations by condition, t test values, significance tests, and confidence intervals.
	Phone (Ngroups = 26)		Notebook (Ngroups = 26)		t test
	M	SD	M	SD	t	p	95% CI
Dyads
Mean originality - 13 judges	4.61	1.04	4.55	1.54	-0.16	0.875	-0.79 – 0.67
Mean appropriateness - 13 judges	5.65	0.67	5.71	0.98	0.29	0.773	-0.40 – 0.54
Estimated parents' willingness to pay (logtransformed) - 13 judges	1.32	0.20	1.27	0.25	-0.83	0.413	-0.17 – 0.07
Creativity - 13 judges	5.17	0.97	4.89	1.45	-0.83	0.412	-0.97 – 0.40
Originality - 13 judges	4.60	1.16	4.62	1.64	0.06	0.950	-0.77 – 0.82
Novelty - 13 judges	4.05	1.20	4.14	1.63	0.21	0.832	-0.71 – 0.88
Usefulness - 13 judges	5.51	0.57	5.56	1.01	0.24	0.809	-0.40 – 0.51
Appropriateness - 13 judges	5.79	0.91	5.87	1.10	0.29	0.776	-0.48 – 0.64
Practicality - Judge 1	4.88	1.42	4.81	2.02	-0.16	0.875	-1.05 – 0.90
Practicality - Judge 2	6.35	1.57	5.96	2.07	-0.75	0.454	-1.41 – 0.63
Practicality - Judge 3	4.35	2.28	5.27	2.26	1.46	0.150	-0.34 – 2.18
Practicality - Judge 4	4.88	0.78	5.00	1.55	0.35	0.730	-0.58 – 0.82
Practicality - Judge 5	5.58	1.36	5.81	1.72	0.54	0.594	-0.63 – 1.10
Practicality - Judge 6	6.04	0.92	6.23	1.45	0.57	0.570	-0.48 – 0.87
Practicality - Judge 7	4.92	2.88	5.88	3.35	1.11	0.273	-0.78 – 2.70
Practicality - Judge 8	4.46	0.81	4.35	1.16	-0.41	0.680	-0.67 – 0.44
Practicality - Judge 9	7.38	0.80	7.23	0.91	-0.65	0.521	-0.63 – 0.32
Practicality - Judge 10	7.15	1.76	7.27	1.97	0.22	0.825	-0.93 – 1.16
Practicality - Judge 11	6.31	2.13	5.96	2.49	-0.54	0.593	-1.64 – 0.95
Practicality - Judge 12	5.00	2.00	5.42	2.27	0.71	0.479	-0.77 – 1.61
Practicality - Judge 13	9.38	1.27	9.38	1.90	0.00	1.000	-0.90 – 0.90
Triads
Mean originality - 13 judges	5.84	1.38	4.57	0.94	-1.82	0.094	-2.79 – 0.25
Mean appropriateness - 13 judges	6.53	0.61	5.62	0.36	-3.03	0.010	-1.57 – -0.26
Estimated parents' willingness to pay (logtransformed) - 13 judges	1.43	0.22	1.14	0.09	-2.79	0.016	-0.51 – -0.06
Creativity - 13 judges	6.19	1.24	4.55	0.63	-2.72	0.019	-2.94 – -0.33
Originality - 13 judges	5.91	1.47	4.80	1.24	-1.42	0.180	-2.80 – 0.59
Novelty - 13 judges	5.42	1.61	4.35	1.03	-1.32	0.210	-2.82 – 0.69
Usefulness - 13 judges	6.49	0.70	5.31	0.64	-3.10	0.009	-2.01 – -0.35
Appropriateness - 13 judges	6.58	0.65	5.94	0.21	-2.11	0.057	-1.31 – 0.02
Practicality - Judge 1	5.22	2.11	4.20	1.79	-0.91	0.379	-3.46 – 1.42
Practicality - Judge 2	6.78	1.86	4.40	1.34	-2.5	0.028	-4.45 – -0.31
Practicality - Judge 3	5.33	3.16	6.80	2.68	0.87	0.400	-2.19 – 5.13
Practicality - Judge 4	4.78	2.05	4.40	1.67	-0.35	0.732	-2.73 – 1.97
Practicality - Judge 5	6.33	1.94	5.40	2.07	-0.84	0.415	-3.34 – 1.48
Practicality - Judge 6	7.00	1.12	5.60	0.55	-2.60	0.023	-2.57 – -0.23
Practicality - Judge 7	4.22	3.56	5.40	3.36	0.60	0.557	-3.07 – 5.43
Practicality - Judge 8	4.44	0.73	4.20	1.10	-0.51	0.622	-1.30 – 0.81
Practicality - Judge 9	7.67	0.87	7.40	0.55	-0.62	0.549	-1.21 – 0.68
Practicality - Judge 10	7.00	3.20	7.00	1.58	0.00	1.000	-3.37 – 3.37
Practicality - Judge 11	5.22	2.99	3.80	2.59	-0.89	0.391	-4.90 – 2.06
Practicality - Judge 12	4.89	2.76	5.20	1.92	0.22	0.828	-2.74 – 3.36
Practicality - Judge 13	9.22	1.39	9.00	1.00	-0.31	0.760	-1.77 – 1.33
Dyads and triads
Mean originality - 13 judges	4.92	1.24	4.55	1.44	-1.12	0.266	-1.03 – 0.28
Mean appropriateness - 13 judges	5.87	0.75	5.70	0.91	-0.86	0.395	-0.58 – 0.23
Estimated parents' willingness to pay (logtransformed) - 13 judges	1.35	0.20	1.25	0.23	-1.85	0.069	-0.21 – 0.01
Creativity - 13 judges	5.43	1.12	4.83	1.34	-1.97	0.053	-1.20 – 0.01
Originality - 13 judges	4.93	1.35	4.65	1.57	-0.79	0.434	-1.00 – 0.44
Novelty - 13 judges	4.40	1.43	4.17	1.54	-0.64	0.528	-0.96 – 0.50
Usefulness - 13 judges	5.76	0.74	5.52	0.95	-1.14	0.259	-0.66 – 0.18
Appropriateness - 13 judges	5.99	0.92	5.88	1.00	-0.48	0.635	-0.58 – 0.36
Practicality - Judge 1	4.97	1.60	4.71	1.97	-0.60	0.554	-1.14 – 0.62
Practicality - Judge 2	6.46	1.63	5.71	2.04	-1.65	0.103	-1.65 – 0.16
Practicality - Judge 3	4.60	2.52	5.51	2.35	1.52	0.134	-0.29 – 2.12
Practicality - Judge 4	4.85	1.21	4.90	1.56	0.15	0.884	-0.63 – 0.74
Practicality - Judge 5	5.77	1.54	5.74	1.75	-0.07	0.942	-0.84 – 0.78
Practicality - Judge 6	6.29	1.05	6.13	1.36	-0.53	0.599	-0.75 – 0.44
Practicality - Judge 7	4.74	3.03	5.81	3.30	1.36	0.177	-0.49 – 2.62
Practicality - Judge 8	4.46	0.78	4.32	1.14	-0.57	0.573	-0.61 – 0.34
Practicality - Judge 9	7.46	0.82	7.26	0.86	-0.97	0.337	-0.61 – 0.21
Practicality - Judge 10	7.11	2.17	7.23	1.89	0.22	0.825	-0.90 – 1.11
Practicality - Judge 11	6.03	2.38	5.61	2.59	-0.68	0.500	-1.63 – 0.81
Practicality - Judge 12	4.97	2.18	5.39	2.19	0.77	0.442	-0.66 – 1.49
Practicality - Judge 13	9.34	1.28	9.32	1.78	-0.05	0.957	-0.78 – 0.74
